# Supplementary material for: Being overweight or obese and risk of developing rheumatoid arthritis among women: a prospective cohort study
Source: HighWire-hosted journal article supplement (doi:10.1136/annrheumdis-2014-205459), 2014-07-24
Supplement: annrheumdis-2014-205459supp.pdf [file annrheumdis-2014-205459supp.pdf]

**Table S1. Hazard ratios (HR) and 95% confident intervals (CI) for incident RA diagnosed at or before age 55 according to time-varying body mass index (BMI) by smoking status (pack years) in Nurses' Health Study and Nurses' Health Study II <sup>a</sup>**

| BMI (kg/m <sup>2</sup> ) | Nurses' Health Study |                 |                    | Nurses' Health Study II |                 |                    |
|--------------------------|----------------------|-----------------|--------------------|-------------------------|-----------------|--------------------|
|                          | Packyear<br>0 - <10  | Packyear<br>≥10 | P int <sup>b</sup> | Packyear<br>0 - <10     | Packyear<br>≥10 | P int <sup>b</sup> |
| 18.5-24.9                | 1.00                 | 1.00            |                    | 1.00                    | 1.00            |                    |
| 25.0-29.9                | 1.20(0.88,1.63)      | 1.24(0.74,2.10) |                    | 1.55(1.12,2.14)         | 2.34(1.36,4.04) |                    |
| ≥30.0                    | 1.43(0.99,2.06)      | 1.87(1.01,3.45) | 0.550              | 1.64(1.16,2.32)         | 2.04(1.15,3.64) | 0.486              |

a. Adjusting for age, community median income, alcohol intake (<5.0, 5.0-<15.0, ≥15 grams/day) and physical activity (0-3, 3-9, 9-18, 18-27, ≥27 METs /week).

b. Overall test p value for BMI by smoking (pack years) interaction
